# Supplementary material
Source: publisher figshare collection journal article supplement (https://acs.figshare.com/ndownloader/files/5030194)
Supplement: Supplementary file 1 [file 5030194]

CRYST1   83.828   86.442  103.673  90.00  90.00  90.00 P 1           1
ATOM      1  C1  IND X   1      15.156  18.265 139.182  0.00  0.00            
ATOM      2  C2  IND X   1      15.956  17.155 139.512  0.00  0.00            
ATOM      3  C3  IND X   1      17.236  17.365 140.092  0.00  0.00            
ATOM      4  C4  IND X   1      17.696  18.675 140.332  0.00  0.00            
ATOM      5  C5  IND X   1      16.886  19.785 139.982  0.00  0.00            
ATOM      6  C6  IND X   1      15.616  19.575 139.412  0.00  0.00            
ATOM      7  C7  IND X   1      17.346  21.095 140.222  0.00  0.00            
ATOM      8  C8  IND X   1      18.616  21.265 140.802  0.00  0.00            
ATOM      9  C9  IND X   1      19.426  20.185 141.152  0.00  0.00            
ATOM     10  C10 IND X   1      18.976  18.875 140.912  0.00  0.00            
ATOM     11  N11 IND X   1      20.566  20.625 141.702  0.00  0.00            
ATOM     12  C12 IND X   1      20.496  22.005 141.712  0.00  0.00            
ATOM     13  C13 IND X   1      19.266  22.455 141.162  0.00  0.00            
ATOM     14  C14 IND X   1      18.426  23.305 142.132  0.00  0.00            
ATOM     15  C15 IND X   1      19.426  23.415 139.982  0.00  0.00            
ATOM     16  C16 IND X   1      21.446  22.985 142.242  0.00  0.00            
ATOM     17  C17 IND X   1      22.646  22.675 142.782  0.00  0.00            
ATOM     18  C18 IND X   1      23.426  23.625 143.342  0.00  0.00            
ATOM     19  C19 IND X   1      24.586  23.255 143.922  0.00  0.00            
ATOM     20  C20 IND X   1      25.366  24.135 144.572  0.00  0.00            
ATOM     21  C21 IND X   1      26.496  23.715 145.192  0.00  0.00            
ATOM     22  C22 IND X   1      27.276  24.595 145.862  0.00  0.00            
ATOM     23  C23 IND X   1      28.526  24.255 146.532  0.00  0.00            
ATOM     24  N24 IND X   1      28.996  23.015 146.852  0.00  0.00            
ATOM     25  C25 IND X   1      29.436  25.275 146.912  0.00  0.00            
ATOM     26  C26 IND X   1      30.526  24.555 147.472  0.00  0.00            
ATOM     27  C27 IND X   1      30.206  23.205 147.402  0.00  0.00            
ATOM     28  C28 IND X   1      29.836  26.165 145.722  0.00  0.00            
ATOM     29  C29 IND X   1      28.806  26.275 147.872  0.00  0.00            
ATOM     30  C30 IND X   1      31.766  24.995 148.022  0.00  0.00            
ATOM     31  C31 IND X   1      32.676  23.995 148.492  0.00  0.00            
ATOM     32  C32 IND X   1      32.346  22.625 148.402  0.00  0.00            
ATOM     33  C33 IND X   1      31.116  22.225 147.862  0.00  0.00            
ATOM     34  C34 IND X   1      32.166  26.345 148.122  0.00  0.00            
ATOM     35  C35 IND X   1      33.916  24.355 149.042  0.00  0.00            
ATOM     36  C36 IND X   1      34.286  25.715 149.142  0.00  0.00            
ATOM     37  C37 IND X   1      33.406  26.705 148.682  0.00  0.00            
ATOM     38  C38 IND X   1      21.616  19.715 142.182  0.00  0.00            
ATOM     39  C39 IND X   1      21.606  19.665 143.722  0.00  0.00            
ATOM     40  C40 IND X   1      22.976  19.345 144.352  0.00  0.00            
ATOM     41  C41 IND X   1      23.126  19.955 145.752  0.00  0.00            
ATOM     42  C42 IND X   1      28.356  21.695 146.842  0.00  0.00            
ATOM     43  C43 IND X   1      28.876  20.865 145.652  0.00  0.00            
ATOM     44  C44 IND X   1      28.846  19.355 145.922  0.00  0.00            
ATOM     45  C45 IND X   1      29.476  18.515 144.802  0.00  0.00            
ATOM     46  S46 IND X   1      24.806  19.825 146.312  0.00  0.00            
ATOM     47  O47 IND X   1      25.586  20.395 145.252  0.00  0.00            
ATOM     48  O48 IND X   1      24.986  18.405 146.492  0.00  0.00            
ATOM     49  O49 IND X   1      24.826  20.595 147.532  0.00  0.00            
ATOM     50  O50 IND X   1      31.406  19.745 143.702  0.00  0.00            
ATOM     51  O51 IND X   1      31.696  19.005 145.992  0.00  0.00            
ATOM     52  O52 IND X   1      31.656  17.395 144.192  0.00  0.00            
ATOM     53  S53 IND X   1      31.236  18.685 144.662  0.00  0.00            
ATOM     54  H54 IND X   1      14.176  18.105 138.742  0.00  0.00            
ATOM     55  H55 IND X   1      15.606  16.155 139.332  0.00  0.00            
ATOM     56  H56 IND X   1      17.846  16.505 140.342  0.00  0.00            
ATOM     57  H57 IND X   1      14.986  20.415 139.152  0.00  0.00            
ATOM     58  H58 IND X   1      16.736  21.955 139.982  0.00  0.00            
ATOM     59  H59 IND X   1      19.566  18.015 141.172  0.00  0.00            
ATOM     60  H60 IND X   1      18.276  22.755 143.062  0.00  0.00            
ATOM     61  H61 IND X   1      17.446  23.535 141.722  0.00  0.00            
ATOM     62  H62 IND X   1      18.916  24.245 142.382  0.00  0.00            
ATOM     63  H63 IND X   1      20.026  22.935 139.202  0.00  0.00            
ATOM     64  H64 IND X   1      19.936  24.335 140.262  0.00  0.00            
ATOM     65  H65 IND X   1      18.466  23.675 139.542  0.00  0.00            
ATOM     66  H66 IND X   1      21.176  24.025 142.232  0.00  0.00            
ATOM     67  H67 IND X   1      23.016  21.675 142.832  0.00  0.00            
ATOM     68  H68 IND X   1      23.106  24.655 143.372  0.00  0.00            
ATOM     69  H69 IND X   1      24.886  22.215 143.892  0.00  0.00            
ATOM     70  H70 IND X   1      25.076  25.175 144.622  0.00  0.00            
ATOM     71  H71 IND X   1      26.746  22.665 145.122  0.00  0.00            
ATOM     72  H72 IND X   1      26.966  25.635 145.802  0.00  0.00            
ATOM     73  H73 IND X   1      28.976  26.605 145.232  0.00  0.00            
ATOM     74  H74 IND X   1      30.356  25.555 144.982  0.00  0.00            
ATOM     75  H75 IND X   1      30.496  26.985 145.992  0.00  0.00            
ATOM     76  H76 IND X   1      27.986  26.835 147.412  0.00  0.00            
ATOM     77  H77 IND X   1      29.506  27.005 148.272  0.00  0.00            
ATOM     78  H78 IND X   1      28.386  25.745 148.732  0.00  0.00            
ATOM     79  H79 IND X   1      33.036  21.865 148.732  0.00  0.00            
ATOM     80  H80 IND X   1      30.896  21.165 147.752  0.00  0.00            
ATOM     81  H81 IND X   1      31.536  27.155 147.782  0.00  0.00            
ATOM     82  H82 IND X   1      34.596  23.595 149.392  0.00  0.00            
ATOM     83  H83 IND X   1      35.246  25.985 149.562  0.00  0.00            
ATOM     84  H84 IND X   1      33.696  27.745 148.742  0.00  0.00            
ATOM     85  H85 IND X   1      22.566  20.005 141.752  0.00  0.00            
ATOM     86  H86 IND X   1      21.486  18.705 141.802  0.00  0.00            
ATOM     87  H87 IND X   1      20.876  18.925 144.062  0.00  0.00            
ATOM     88  H88 IND X   1      21.236  20.615 144.122  0.00  0.00            
ATOM     89  H89 IND X   1      23.766  19.735 143.702  0.00  0.00            
ATOM     90  H90 IND X   1      23.136  18.265 144.382  0.00  0.00            
ATOM     91  H91 IND X   1      27.266  21.725 146.892  0.00  0.00            
ATOM     92  H92 IND X   1      28.616  21.195 147.772  0.00  0.00            
ATOM     93  H93 IND X   1      29.896  21.165 145.412  0.00  0.00            
ATOM     94  H94 IND X   1      28.286  21.075 144.752  0.00  0.00            
ATOM     95  H95 IND X   1      27.806  19.045 146.062  0.00  0.00            
ATOM     96  H96 IND X   1      29.366  19.125 146.852  0.00  0.00            
ATOM     97  H97 IND X   1      29.046  18.765 143.832  0.00  0.00            
ATOM     98  H98 IND X   1      29.286  17.455 144.972  0.00  0.00            
ATOM     99  H99 IND X   1      22.466  19.465 146.462  0.00  0.00            
ATOM    100 H100 IND X   1      22.876  21.015 145.742  0.00  0.00            
END
